# Supplementary material for: Preventive Behaviors and Information Sources during COVID-19 Pandemic: A Cross-Sectional Study in Japan
Source: MDPI journal article supplement (doi:10.3390/ijerph192114511), 2022-11-04
Supplement: s1 [file s1]

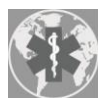

## Supplementary Materials

**Table S1. Factors associated with the COVID-19 preventive measures.**

|                                                             | OR (95% CI)        |                    |                     |
|-------------------------------------------------------------|--------------------|--------------------|---------------------|
|                                                             | 3Cs                | Hand hygiene       | Respiratory hygiene |
| <b>Age (SA)</b>                                             |                    |                    |                     |
| 20's                                                        | 1.00               | 1.00               | 1.00                |
| 30's                                                        | 1.41(1.25-1.60)*** | 1.44(1.27-1.63)*** | 1.55(1.39-1.73)***  |
| 40's                                                        | 1.59(1.41-1.80)*** | 1.45(1.28-1.65)*** | 1.84(1.64-2.05)***  |
| 50's                                                        | 2.05(1.81-2.33)*** | 1.64(1.43-1.89)*** | 2.35(2.09-2.66)***  |
| 60's                                                        | 2.21(1.94-2.51)*** | 1.71(1.47-1.98)*** | 2.51(2.22-2.84)***  |
| 70's+                                                       | 2.26(1.97-2.60)*** | 1.78(1.51-2.11)*** | 2.25(1.96-2.58)***  |
| <b>Gender (SA)</b>                                          |                    |                    |                     |
| Female                                                      | 1.00               | 1.00               | 1.00                |
| Male                                                        | 0.71(0.66-0.76)*** | 0.65(0.60-0.71)*** | 0.61(0.57-0.65)***  |
| <b>Highest educational level (SA)</b>                       |                    |                    |                     |
| Middle and High school                                      | 1.00               | 1.00               | 1.00                |
| Junior college                                              | 1.06(0.99-1.14)    | 1.10(1.00-1.22)    | 1.14(1.05-1.24)**   |
| University                                                  | 1.05(0.98-1.12)    | 0.97(0.90-1.06)    | 1.02(0.96-1.09)     |
| Graduate School                                             | 1.11(0.97-1.28)    | 0.81(0.69-0.95)*   | 0.88(0.76-1.01)     |
| <b>Region (SA)</b>                                          |                    |                    |                     |
| Hokkaido and Tohoku                                         | 1.00               | 1.00               | 1.00                |
| Kanto                                                       | 1.34(1.23-1.47)*** | 1.08(0.96-1.21)    | 1.18(1.07-1.30)**   |
| Chubu                                                       | 1.03(0.93-1.14)    | 0.86(0.75-0.98)*   | 1.08(0.97-1.19)     |
| Kinki                                                       | 1.15(1.04-1.27)**  | 0.93(0.81-1.05)    | 1.13(1.02-1.25)*    |
| Chugoku and Shikoku                                         | 1.01(0.90-1.14)    | 0.72(0.62-0.83)*** | 0.97(0.86-1.10)     |
| Kyushu                                                      | 1.07(0.96-1.19)    | 0.87(0.75-1.00)*   | 1.17(1.05-1.31)**   |
| <b>Occupation type (SA)</b>                                 |                    |                    |                     |
| Agriculture, forestry and fisheries                         | 1.00               | 1.00               | 1.00                |
| Construction                                                | 1.19(0.81-1.74)    | 1.04(0.69-1.56)    | 1.30(0.91-1.86)     |
| Manufacturing                                               | 1.22(0.86-1.75)    | 1.14(0.78-1.67)    | 1.32(0.94-1.84)     |
| Information and communications                              | 1.16(0.79-1.70)    | 1.23(0.82-1.86)    | 1.42(0.99-2.03)     |
| Transportation and postal services                          | 1.01(0.69-1.49)    | 1.42(0.94-2.15)    | 1.34(0.94-1.92)     |
| Wholesale and retail trade                                  | 1.15(0.80-1.64)    | 1.27(0.86-1.88)    | 1.35(0.96-1.89)     |
| Finance and insurance                                       | 1.24(0.84-1.82)    | 1.33(0.87-2.04)    | 1.36(0.94-1.96)     |
| Real estate and goods rental and leasing                    | 1.02(0.68-1.53)    | 0.95(0.60-1.48)    | 1.29(0.87-1.92)     |
| Scientific research, professional and technical services    | 1.39(0.93-2.10)    | 1.53(0.95-2.46)    | 1.57(1.05-2.35)*    |
| Accommodations, food and beverage services                  | 1.13(0.77-1.67)    | 1.18(0.77-1.81)    | 1.25(0.86-1.81)     |
| Living-related and personal services and amusement services | 1.06(0.71-1.59)    | 1.46(0.92-2.32)    | 1.27(0.86-1.87)     |
| Education and learning support                              | 1.11(0.77-1.62)    | 1.28(0.84-1.94)    | 1.34(0.94-1.92)     |
| Medical healthcare and welfare                              | 1.08(0.75-1.55)    | 1.16(0.78-1.72)    | 1.22(0.87-1.72)     |

|                                                                                     |                    |                    |                    |
|-------------------------------------------------------------------------------------|--------------------|--------------------|--------------------|
| Combined services                                                                   | 1.23(0.78-1.93)    | 1.07(0.65-1.78)    | 1.38(0.89-2.14)    |
| Services (not elsewhere classified)                                                 | 1.20(0.84-1.72)    | 1.26(0.86-1.86)    | 1.35(0.97-1.89)    |
| Public service (not elsewhere classified)                                           | 0.98(0.67-1.43)    | 1.20(0.79-1.81)    | 1.58(1.10-2.26)*   |
| Students                                                                            | 0.95(0.63-1.45)    | 1.10(0.72-1.70)    | 1.07(0.73-1.56)    |
| Homemaker                                                                           | 1.49(1.05-2.12)*   | 1.58(1.07-2.32)*   | 1.50(1.08-2.10)*   |
| Others                                                                              | 1.27(0.90-1.80)    | 1.21(0.83-1.76)    | 1.11(0.80-1.54)    |
| Annual household income in 2020 (million JPY) (SA)                                  |                    |                    | 1.01(1.00-1.03)    |
| Household size including respondent (SA)                                            |                    |                    |                    |
| 1                                                                                   | 1.00               | 1.00               | 1.00               |
| 2                                                                                   | 1.21(1.10-1.32)*** | 1.35(1.21-1.51)*** | 1.18(1.08-1.30)**  |
| 3                                                                                   | 1.08(0.98-1.18)    | 1.33(1.19-1.48)*** | 1.07(0.97-1.18)    |
| 4                                                                                   | 0.99(0.88-1.10)    | 1.27(1.12-1.44)*** | 1.16(1.04-1.30)*   |
| 5                                                                                   | 1.05(0.90-1.22)    | 1.42(1.19-1.71)*** | 1.24(1.06-1.45)**  |
| More than 6                                                                         | 0.96(0.78-1.18)    | 1.22(0.95-1.57)    | 1.12(0.91-1.39)    |
| Marital size (SA)                                                                   |                    |                    |                    |
| Married (including de facto marriage)                                               | 1.00               | 1.00               | 1.00               |
| Not married (without partner)                                                       | 1.11(1.02-1.21)*   | 1.14(1.03-1.27)*   | 1.20(1.10-1.31)*** |
| Not married (with a partner)                                                        | 1.02(0.89-1.17)    | 1.20(1.02-1.40)*   | 1.21(1.06-1.38)**  |
| Widowed                                                                             | 1.02(0.89-1.17)    | 1.05(0.85-1.30)    | 1.05(0.90-1.24)    |
| Divorced                                                                            | 1.07(0.96-1.20)    | 1.18(1.01-1.37)*   | 1.17(1.03-1.33)*   |
| Self-reported health status (SA)                                                    |                    |                    |                    |
| Very good                                                                           | 1.00               | 1.00               | 1.00               |
| Good                                                                                | 0.91(0.85-0.97)**  | 1.01(0.92-1.11)    | 1.01(0.94-1.09)    |
| Fair                                                                                | 0.89(0.83-0.96)**  | 0.95(0.86-1.04)    | 0.95(0.88-1.03)    |
| Poor                                                                                | 0.87(0.79-0.97)**  | 0.98(0.86-1.12)    | 0.92(0.83-1.03)    |
| Very poor                                                                           | 0.98(0.81-1.18)    | 0.82(0.65-1.02)    | 0.83(0.68-1.00)*   |
| How confident are you filling out medical forms by yourself? (health literacy) (SA) |                    |                    |                    |
| Not at all                                                                          | 1.00               | 1.00               | 1.00               |
| A little bit                                                                        | 0.93(0.70-1.23)    | 1.56(1.18-2.05)**  | 1.20(0.93-1.55)    |
| Somewhat                                                                            | 1.08(0.84-1.40)    | 1.71(1.33-2.19)*** | 1.25(0.99-1.58)    |
| Extremely                                                                           | 1.30(1.01-1.67)*   | 2.28(1.78-2.92)*** | 1.52(1.21-1.91)*** |
| Quite a bit                                                                         | 1.58(1.23-2.04)*** | 2.63(2.05-3.38)*** | 1.86(1.48-2.35)*** |
| Have you ever received a COVID-19 test? (MA)                                        |                    |                    |                    |
| No                                                                                  |                    | 2.18(1.75-2.72)*** |                    |
| Yes – PCR test                                                                      |                    | 1.78(1.39-2.27)*** |                    |
| Yes – antigen test                                                                  |                    | 1.55(1.11-2.18)*   | 0.74(0.58-0.96)*   |
| Yes – antibody testing                                                              |                    | 1.86(1.28-2.70)**  |                    |
| Yes – unsure about either of the three                                              | 0.49(0.37-0.64)*** |                    | 0.46(0.36-0.58)*** |
| Presence of underlying diseases (SA)                                                |                    |                    |                    |
| Yes                                                                                 | 1.00               |                    |                    |
| No                                                                                  | 1.07(0.99-1.16)    |                    |                    |
| Living with family members who are elderly or have underlying diseases (SA)         |                    |                    |                    |

|                                                                                                                                        |                    |                    |                    |
|----------------------------------------------------------------------------------------------------------------------------------------|--------------------|--------------------|--------------------|
| Yes                                                                                                                                    | 1.00               | 1.00               |                    |
| No                                                                                                                                     | 0.88(0.79-0.98)*   | 0.87(0.80-0.94)*** |                    |
| Do you receive an influenza vaccine? (SA)                                                                                              |                    |                    |                    |
| Every year                                                                                                                             | 1.00               |                    |                    |
| Every few years                                                                                                                        | 0.90(0.81-1.00)*   |                    |                    |
| Rarely or never                                                                                                                        | 0.73(0.67-0.80)*** |                    |                    |
| Did you receive on routine immunization? (SA)                                                                                          |                    |                    |                    |
| All                                                                                                                                    | 1.00               | 1.00               | 1.00               |
| Partially                                                                                                                              | 0.82(0.76-0.89)*** | 0.86(0.76-0.97)*   | 0.92(0.84-1.01)    |
| None                                                                                                                                   | 0.81(0.75-0.87)*** | 0.98(0.88-1.09)    | 0.93(0.85-1.00)*   |
| Not sure                                                                                                                               | 0.75(0.69-0.81)*** | 0.95(0.85-1.07)    | 0.91(0.83-1.00)*   |
| How anxious are you about COVID-19? (SA)                                                                                               |                    |                    |                    |
| Not at all anxious                                                                                                                     | 1.00               | 1.00               | 1.00               |
| Vaguely anxious                                                                                                                        | 1.55(1.38-1.76)*** | 2.01(1.79-2.25)*** | 1.52(1.37-1.68)*** |
| Have a clear sense of anxiety                                                                                                          | 2.58(2.26-2.94)*** | 2.68(2.34-3.07)*** | 1.68(1.49-1.89)*** |
| Feel fear and have anxiety                                                                                                             | 3.26(2.79-3.82)*** | 2.20(1.84-2.62)*** | 1.76(1.51-2.05)*** |
| To what extent did the COVID-19 pandemic affect your life, within the past year? (SA)                                                  |                    |                    |                    |
| Not at all                                                                                                                             | 1.00               | 1.00               | 1.00               |
| Not much                                                                                                                               | 1.11(0.97-1.27)    | 1.28(1.12-1.45)*** | 1.26(1.12-1.42)*** |
| Somewhat                                                                                                                               | 1.30(1.14-1.49)*** | 2.08(1.83-2.37)*** | 1.61(1.43-1.81)*** |
| Quite a lot                                                                                                                            | 1.60(1.38-1.84)*** | 2.59(2.21-3.02)*** | 1.85(1.62-2.12)*** |
| What is your best guess as to whether you will get COVID-19 within the next 6 months? (SA)                                             |                    |                    |                    |
| I don't think I will get COVID-19                                                                                                      | 1.00               | 1.00               | 1.00               |
| I think I will get a mild case of COVID-19                                                                                             | 0.92(0.87-0.98)**  | 0.89(0.82-0.96)**  | 0.95(0.89-1.01)    |
| I think I will get seriously ill from COVID-19                                                                                         | 1.14(1.05-1.24)**  | 0.85(0.76-0.95)**  | 0.97(0.89-1.07)    |
| I have already had COVID-19                                                                                                            | 0.21(0.12-0.35)*** | 0.29(0.20-0.41)*** | 0.37(0.26-0.52)*** |
| Has anyone close to you ever been infected with COVID-19? (MA)                                                                         |                    |                    |                    |
| Family or friends                                                                                                                      |                    | 0.77(0.64-0.93)**  |                    |
| Colleagues at work                                                                                                                     | 1.30(1.07-1.60)*   | 0.73(0.63-0.85)*** |                    |
| No/I don't know.                                                                                                                       | 1.36(1.15-1.60)*** |                    | 1.19(1.08-1.32)**  |
| Have you ever refrained from visiting a medical institution because you were anxious about being infected by the new coronavirus? (MA) |                    |                    |                    |
| Have refrained from regular hospital visits                                                                                            | 1.54(1.43-1.66)*** | 1.22(1.01-1.47)*   | 1.34(1.17-1.54)*** |
| Have refrained from visiting the hospital for sudden symptoms such as a cold, headache, or stomachache                                 | 1.22(1.12-1.34)*** | 1.35(1.11-1.64)**  | 1.52(1.32-1.75)*** |
| Have refrained from medical checkups, physical examinations, or cancer screenings                                                      | 1.36(1.25-1.48)*** | 1.64(1.36-1.99)*** | 1.34(1.17-1.54)*** |
| Have refrained from other medical examinations                                                                                         | 1.25(1.15-1.36)*** | 1.29(1.06-1.58)*   | 1.29(1.11-1.50)**  |
| No                                                                                                                                     |                    | 1.25(1.03-1.52)*   | 1.22(1.06-1.41)**  |
| When a vaccine for COVID-19 becomes available, will you get vaccinated? (SA)                                                           |                    |                    |                    |
| Yes                                                                                                                                    | 1.00               | 1.00               |                    |
| No                                                                                                                                     | 0.88(0.77-1.01)    | 0.91(0.81-1.03)    |                    |
| Not sure                                                                                                                               | 1.05(0.96-1.16)    | 1.07(0.99-1.16)    |                    |
| How do you feel are the benefits of the COVID-19 vaccine? (SA)                                                                         |                    |                    |                    |

|                                                                                                          |                    |                    |                    |
|----------------------------------------------------------------------------------------------------------|--------------------|--------------------|--------------------|
| Very small                                                                                               | 1.00               | 1.00               | 1.00               |
| Small                                                                                                    | 1.14(0.91-1.42)    | 1.18(0.93-1.50)    | 1.34(1.08-1.65)**  |
| Medium                                                                                                   | 1.26(1.03-1.55)*   | 1.32(1.06-1.65)*   | 1.51(1.24-1.85)*** |
| Large                                                                                                    | 1.27(1.04-1.57)*   | 1.65(1.32-2.07)*** | 1.63(1.33-1.99)*** |
| Very large                                                                                               | 1.33(1.07-1.67)*   | 1.64(1.28-2.10)*** | 1.60(1.29-1.99)*** |
| How do you think the disadvantages of the COVID-19 vaccine are? (SA)                                     |                    |                    |                    |
| Very small                                                                                               |                    | 1.00               | 1.00               |
| Small                                                                                                    |                    | 1.03(0.89-1.21)    | 0.97(0.86-1.10)    |
| Medium                                                                                                   |                    | 1.01(0.86-1.19)    | 0.98(0.86-1.11)    |
| Large                                                                                                    |                    | 0.92(0.77-1.09)    | 0.89(0.77-1.03)    |
| Very large                                                                                               |                    | 0.93(0.73-1.17)    | 1.01(0.82-1.24)    |
| If others have been vaccinated against COVID-19, do you think you should be vaccinated as well? (SA)     |                    |                    |                    |
| Strongly disagree                                                                                        | 1.00               | 1.00               | 1.00               |
| Disagree                                                                                                 | 1.04(0.86-1.27)    | 0.97(0.78-1.20)    | 0.97(0.80-1.18)    |
| Neither agree nor disagree                                                                               | 1.14(0.94-1.38)    | 0.90(0.73-1.12)    | 0.91(0.75-1.11)    |
| Agree                                                                                                    | 1.11(0.92-1.35)    | 1.10(0.88-1.38)    | 1.03(0.85-1.26)    |
| Strongly agree                                                                                           | 1.36(1.10-1.68)**  | 1.06(0.82-1.37)    | 1.15(0.93-1.44)    |
| Do you think getting a COVID-19 vaccine will ease your anxiety? (SA)                                     |                    |                    |                    |
| Strongly disagree                                                                                        | 1.00               | 1.00               | 1.00               |
| Disagree                                                                                                 | 0.82(0.69-0.98)*   | 0.80(0.65-0.99)*   | 0.63(0.52-0.76)*** |
| Neither agree nor disagree                                                                               | 0.80(0.67-0.95)**  | 0.63(0.51-0.78)*** | 0.56(0.46-0.67)*** |
| Agree                                                                                                    | 0.72(0.60-0.86)*** | 0.62(0.50-0.78)*** | 0.55(0.45-0.66)*** |
| Strongly agree                                                                                           | 0.77(0.61-0.96)*   | 0.72(0.53-0.97)*   | 0.50(0.39-0.64)*** |
| Do you trust scientists in the field of vaccine development for COVID-19? (SA)                           |                    |                    |                    |
| Strongly distrust                                                                                        |                    |                    | 1.00               |
| Distrust                                                                                                 |                    |                    | 1.35(0.99-1.84)    |
| Neutral                                                                                                  |                    |                    | 1.31(0.96-1.78)    |
| Trust                                                                                                    |                    |                    | 1.36(0.99-1.86)    |
| Strongly trust                                                                                           |                    |                    | 1.45(1.00-2.10)    |
| Do you trust the public authorities to approve vaccines for COVID-19? (SA)                               |                    |                    |                    |
| Strongly distrust                                                                                        | 1.00               | 1.00               | 1.00               |
| Distrust                                                                                                 | 0.82(0.67-1.02)    | 0.85(0.67-1.09)    | 0.86(0.69-1.08)    |
| Neutral                                                                                                  | 0.70(0.57-0.86)**  | 0.82(0.64-1.04)    | 0.77(0.62-0.97)*   |
| Trust                                                                                                    | 0.74(0.60-0.91)**  | 0.80(0.62-1.04)    | 0.77(0.61-0.98)*   |
| Strongly trust                                                                                           | 0.72(0.55-0.96)*   | 0.46(0.32-0.66)*** | 0.61(0.45-0.84)**  |
| Do you trust your healthcare provider about vaccination against COVID-19? (SA)                           |                    |                    |                    |
| Strongly distrust                                                                                        | 1.00               | 1.00               | 1.00               |
| Distrust                                                                                                 | 1.25(0.92-1.70)    | 1.21(0.88-1.66)    | 1.21(0.88-1.67)    |
| Neutral                                                                                                  | 1.25(0.93-1.68)    | 1.30(0.96-1.76)    | 1.27(0.92-1.73)    |
| Trust                                                                                                    | 1.22(0.90-1.65)    | 1.45(1.06-1.98)*   | 1.41(1.02-1.95)*   |
| Strongly trust                                                                                           | 1.08(0.78-1.50)    | 1.48(1.03-2.12)*   | 1.52(1.07-2.17)*   |
| Do you think that healthcare workers and employees of elderly care facilities should be vaccinated? (SA) |                    |                    |                    |

|                                                     |                    |                    |                    |
|-----------------------------------------------------|--------------------|--------------------|--------------------|
| Yes                                                 | 1.00               | 1.00               | 1.00               |
| No                                                  | 0.59(0.48-0.71)*** | 0.56(0.48-0.66)*** | 0.64(0.55-0.75)*** |
| Can't say either                                    | 0.87(0.80-0.94)*** | 0.87(0.79-0.95)**  | 0.93(0.86-1.01)    |
| Use of information source                           |                    |                    |                    |
| Healthcare professionals                            | 1.36(1.26-1.47)*** | 1.27(1.13-1.43)*** | 1.27(1.16-1.39)*** |
| TV, radio and newspaper                             | 1.47(1.35-1.61)*** | 2.15(1.96-2.36)*** | 1.89(1.74-2.05)*** |
| Scientific literature                               | 1.36(1.07-1.72)*   | 1.48(1.02-2.16)*   |                    |
| Books and magazines                                 | 1.15(1.03-1.28)*   |                    | 1.26(1.10-1.44)**  |
| The Internet                                        | 1.37(1.30-1.46)*** | 1.92(1.79-2.06)*** | 1.64(1.55-1.74)*** |
| Medical information sites                           | 1.31(1.10-1.55)**  | 2.16(1.57-2.97)*** | 1.39(1.12-1.72)**  |
| Blogs or web pages of celebrities and famous people |                    | 1.34(0.97-1.86)    |                    |
| Governments                                         | 1.42(1.34-1.5)***  | 1.92(1.74-2.11)*** | 1.73(1.61-1.85)*** |
| Family and friends                                  | 1.12(1.05-1.20)**  | 1.52(1.36-1.69)*** | 1.34(1.24-1.45)*** |
| Scientists and researchers                          | 1.34(1.14-1.58)**  |                    | 1.41(1.13-1.77)**  |
| Pharmaceutical and other companies                  |                    | 0.82(0.68-0.98)*   | 0.83(0.70-0.98)*   |
| Social media                                        | 1.12(1.04-1.2)**   | 1.44(1.30-1.60)*** | 1.48(1.36-1.61)*** |
| Trust of information source                         |                    |                    |                    |
| Healthcare professionals                            | 1.10(1.05-1.16)**  | 1.12(1.04-1.20)**  | 1.13(1.06-1.19)*** |
| Books and magazines                                 |                    | 0.88(0.82-0.95)*** | 0.92(0.86-0.98)**  |
| The Internet                                        | 0.96(0.90-1.01)    |                    | 1.06(1.00-1.12)    |
| Medical information sites                           |                    | 1.09(1.02-1.16)*   | 1.11(1.05-1.17)*** |
| Blogs or web pages of celebrities and famous people |                    | 0.90(0.84-0.98)**  | 0.91(0.86-0.97)**  |
| Public sectors                                      |                    | 1.15(1.06-1.24)**  |                    |
| Family and friends                                  |                    | 1.07(0.99-1.15)    |                    |
| Scientists and researchers                          |                    | 1.13(1.04-1.22)**  | 1.11(1.05-1.17)*** |
| Pharmaceutical and other companies                  | 1.08(1.02-1.15)*   | 0.91(0.83-1.01)    |                    |
| Social media                                        | 0.91(0.86-0.96)**  | 0.73(0.67-0.80)*** | 0.81(0.76-0.87)*** |

\*, p<0.05, \*\*, p<0.01, \*\*\*, p<0.001

OR: Odds Ratio, CI: Confidence Intervals.

3Cs: "closed spaces", "crowded places", and "close-contact settings"

**Table S2.** Number of information sources used and adoption of preventive measures.

|                                    | OR (95% CI)        |                    |                     |
|------------------------------------|--------------------|--------------------|---------------------|
|                                    | 3Cs                | Hand hygiene       | Respiratory hygiene |
| Number of information sources used |                    |                    |                     |
| 1                                  | 1.00               | 1.00               | 1.00                |
| 2                                  | 1.39(1.28-1.52)*** | 1.92(1.76-2.10)*** | 1.68(1.55-1.81)***  |
| 3                                  | 1.62(1.48-1.78)*** | 2.70(2.43-2.99)*** | 2.16(1.99-2.35)***  |
| 4                                  | 1.92(1.74-2.11)*** | 3.65(3.21-4.14)*** | 2.83(2.57-3.13)***  |
| 5 or more                          | 2.70(2.48-2.94)*** | 5.92(5.27-6.64)*** | 4.68(4.29-5.11)***  |
| Age (SA)                           |                    |                    |                     |
| 20's                               | 1.00               | 1.00               | 1.00                |

|                                                             |                    |                    |                    |
|-------------------------------------------------------------|--------------------|--------------------|--------------------|
| 30's                                                        | 1.43(1.26-1.61)*** | 1.45(1.29-1.64)*** | 1.56(1.40-1.74)*** |
| 40's                                                        | 1.60(1.42-1.81)*** | 1.45(1.28-1.63)*** | 1.83(1.64-2.04)*** |
| 50's                                                        | 2.06(1.81-2.33)*** | 1.60(1.41-1.83)*** | 2.33(2.07-2.62)*** |
| 60's                                                        | 2.16(1.90-2.46)*** | 1.59(1.39-1.81)*** | 2.37(2.10-2.68)*** |
| 70's+                                                       | 2.17(1.89-2.49)*** | 1.56(1.34-1.80)*** | 2.02(1.77-2.31)*** |
| Gender (SA)                                                 |                    |                    |                    |
| Female                                                      | 1.00               | 1.00               | 1.00               |
| Male                                                        | 0.70(0.65-0.74)*** | 0.61(0.56-0.66)*** | 0.58(0.55-0.62)*** |
| Highest educational level (SA)                              |                    |                    |                    |
| Middle and High school                                      | 1.00               | 1.00               | 1.00               |
| Junior college                                              | 1.06(0.98-1.14)    | 1.08(0.98-1.19)    | 1.13(1.04-1.23)**  |
| University                                                  | 1.05(0.98-1.11)    | 0.94(0.87-1.02)    | 1.01(0.95-1.08)    |
| Graduate School                                             | 1.14(0.99-1.30)    | 0.78(0.66-0.92)**  | 0.88(0.76-1.01)    |
| Region (SA)                                                 |                    |                    |                    |
| Hokkaido and Tohoku                                         | 1.00               | 1.00               | 1.00               |
| Kanto                                                       | 1.37(1.26-1.50)*** | 1.11(0.99-1.25)    | 1.23(1.12-1.35)*** |
| Chubu                                                       | 1.04(0.95-1.15)    | 0.87(0.77-0.99)*   | 1.10(0.99-1.22)    |
| Kinki                                                       | 1.18(1.07-1.30)**  | 0.96(0.84-1.09)    | 1.17(1.05-1.29)**  |
| Chugoku and Shikoku                                         | 1.03(0.92-1.16)    | 0.74(0.64-0.85)*** | 1.00(0.89-1.12)    |
| Kyushu                                                      | 1.09(0.98-1.22)    | 0.90(0.78-1.04)    | 1.21(1.08-1.36)**  |
| Occupation type (SA)                                        |                    |                    |                    |
| Agriculture, forestry and fisheries                         | 1.00               | 1.00               | 1.00               |
| Construction                                                | 1.18(0.81-1.73)    | 1.09(0.72-1.63)    | 1.37(0.96-1.96)    |
| Manufacturing                                               | 1.24(0.87-1.76)    | 1.21(0.83-1.77)    | 1.4(1.01-1.96)*    |
| Information and communications                              | 1.18(0.81-1.72)    | 1.35(0.89-2.03)    | 1.55(1.09-2.22)*   |
| Transportation and postal services                          | 1.03(0.70-1.51)    | 1.56(1.03-2.35)*   | 1.45(1.01-2.07)*   |
| Wholesale and retail trade                                  | 1.16(0.81-1.66)    | 1.37(0.92-2.02)    | 1.44(1.03-2.02)*   |
| Finance and insurance                                       | 1.25(0.85-1.83)    | 1.38(0.90-2.12)    | 1.44(1.00-2.08)    |
| Real estate and goods rental and leasing                    | 1.01(0.67-1.52)    | 0.98(0.62-1.53)    | 1.35(0.91-1.99)    |
| Scientific research, professional and technical services    | 1.42(0.94-2.13)    | 1.59(0.99-2.56)    | 1.66(1.12-2.48)*   |
| Accommodations, food and beverage services                  | 1.15(0.78-1.70)    | 1.25(0.81-1.92)    | 1.33(0.92-1.93)    |
| Living-related and personal services and amusement services | 1.08(0.73-1.62)    | 1.58(1.00-2.50)    | 1.36(0.93-2.00)    |
| Education and learning support                              | 1.12(0.78-1.63)    | 1.34(0.89-2.03)    | 1.43(1.00-2.04)    |
| Medical healthcare and welfare                              | 1.13(0.79-1.61)    | 1.19(0.81-1.77)    | 1.27(0.90-1.78)    |
| Combined services                                           | 1.24(0.79-1.94)    | 1.11(0.67-1.83)    | 1.45(0.94-2.24)    |
| Services (not elsewhere classified)                         | 1.22(0.85-1.74)    | 1.34(0.91-1.97)    | 1.44(1.03-2.00)*   |
| Public service (not elsewhere classified)                   | 0.99(0.68-1.45)    | 1.25(0.83-1.88)    | 1.70(1.19-2.43)**  |
| Students                                                    | 0.96(0.63-1.45)    | 1.16(0.76-1.79)    | 1.11(0.76-1.61)    |
| Homemaker                                                   | 1.50(1.06-2.13)*   | 1.59(1.09-2.34)*   | 1.58(1.13-2.20)**  |
| Others                                                      | 1.29(0.91-1.83)    | 1.30(0.89-1.89)    | 1.18(0.85-1.63)    |
| Household size including respondent (SA)                    |                    |                    |                    |
| 1                                                           | 1.00               | 1.00               | 1.00               |

|                                                                                     |                    |                    |                    |
|-------------------------------------------------------------------------------------|--------------------|--------------------|--------------------|
| 2                                                                                   | 1.19(1.09-1.31)*** | 1.27(1.15-1.39)*** | 1.19(1.08-1.30)**  |
| 3                                                                                   | 1.06(0.97-1.17)    | 1.24(1.12-1.37)*** | 1.07(0.98-1.18)    |
| 4                                                                                   | 0.97(0.87-1.08)    | 1.18(1.05-1.32)**  | 1.17(1.05-1.31)**  |
| 5                                                                                   | 1.04(0.90-1.21)    | 1.37(1.15-1.62)**  | 1.28(1.10-1.49)**  |
| More than 6                                                                         | 0.93(0.76-1.14)    | 1.07(0.84-1.36)    | 1.10(0.89-1.35)    |
| Marital size (SA)                                                                   |                    |                    |                    |
| Married (including de facto marriage)                                               | 1.00               |                    | 1.00               |
| Not married (without partner)                                                       | 1.10(1.01-1.20)*   |                    | 1.15(1.06-1.26)**  |
| Not married (with a partner)                                                        | 1.00(0.88-1.15)    |                    | 1.15(1.01-1.31)    |
| Widowed                                                                             | 1.02(0.89-1.17)    |                    | 1.05(0.89-1.24)    |
| Divorced                                                                            | 1.09(0.97-1.22)    |                    | 1.17(1.03-1.33)*   |
| Self-reported health status (SA)                                                    |                    |                    |                    |
| Very good                                                                           | 1.00               |                    | 1.00               |
| Good                                                                                | 0.91(0.85-0.98)**  |                    | 1.02(0.95-1.10)    |
| Fair                                                                                | 0.90(0.83-0.97)**  |                    | 0.96(0.89-1.04)    |
| Poor                                                                                | 0.88(0.80-0.98)*   |                    | 0.94(0.85-1.05)    |
| Very poor                                                                           | 0.97(0.81-1.18)    |                    | 0.83(0.68-1.01)    |
| How confident are you filling out medical forms by yourself? (health literacy) (SA) |                    |                    |                    |
| Not at all                                                                          | 1.00               | 1.00               | 1.00               |
| A little bit                                                                        | 0.91(0.69-1.20)    | 1.57(1.20-2.05)**  | 1.18(0.92-1.52)    |
| Somewhat                                                                            | 1.08(0.83-1.39)    | 1.77(1.39-2.26)*** | 1.25(0.99-1.57)    |
| Extremely                                                                           | 1.29(1.00-1.66)    | 2.39(1.88-3.04)*** | 1.53(1.22-1.93)*** |
| Quite a bit                                                                         | 1.58(1.23-2.04)*** | 2.75(2.16-3.51)*** | 1.89(1.50-2.38)*** |
| Have you ever received a COVID-19 test? (MA)                                        |                    |                    |                    |
| No                                                                                  |                    | 2.43(1.96-3.01)*** |                    |
| Yes – PCR test                                                                      |                    | 1.95(1.53-2.48)*** |                    |
| Yes – antigen test                                                                  |                    | 1.57(1.12-2.18)**  | 0.71(0.55-0.91)**  |
| Yes – antibody testing                                                              |                    | 1.89(1.31-2.72)**  |                    |
| Yes – unsure about either of the three                                              | 0.48(0.36-0.63)*** |                    | 0.42(0.34-0.53)*** |
| Living with family members who are elderly or have underlying diseases (SA)         |                    |                    |                    |
| Yes                                                                                 |                    | 1.00               | 1.00               |
| No                                                                                  |                    | 0.88(0.79-0.97)*   | 0.87(0.80-0.94)*** |
| Do you receive an influenza vaccine? (SA)                                           |                    |                    |                    |
| Every year                                                                          |                    | 1.00               |                    |
| Every few years                                                                     |                    | 0.90(0.81-1.00)*   |                    |
| Rarely or never                                                                     |                    | 0.74(0.67-0.81)*** |                    |
| Did you receive on routine immunization? (SA)                                       |                    |                    |                    |
| All                                                                                 | 1.00               | 1.00               |                    |
| Partially                                                                           | 0.81(0.75-0.88)*** | 0.85(0.76-0.96)**  |                    |
| None                                                                                | 0.81(0.76-0.87)*** | 1.03(0.92-1.15)    |                    |
| Not sure                                                                            | 0.74(0.68-0.81)*** | 0.97(0.86-1.09)    |                    |
| How anxious are you about COVID-19? (SA)                                            |                    |                    |                    |

|                                                                                                                                        |                    |                    |                    |
|----------------------------------------------------------------------------------------------------------------------------------------|--------------------|--------------------|--------------------|
| Not at all anxious                                                                                                                     | 1.00               | 1.00               | 1.00               |
| Vaguely anxious                                                                                                                        | 1.56(1.38-1.76)*** | 2.08(1.86-2.32)*** | 1.56(1.40-1.73)*** |
| Have a clear sense of anxiety                                                                                                          | 2.60(2.28-2.96)*** | 2.71(2.37-3.10)*** | 1.71(1.51-1.92)*** |
| Feel fear and have anxiety                                                                                                             | 3.31(2.83-3.88)*** | 2.14(1.80-2.54)*** | 1.76(1.51-2.05)*** |
| To what extent did the COVID-19 pandemic affect your life, within the past year? (SA)                                                  |                    |                    |                    |
| Not at all                                                                                                                             | 1.00               | 1.00               | 1.00               |
| Not much                                                                                                                               | 1.10(0.96-1.27)    | 1.27(1.12-1.45)*** | 1.26(1.11-1.42)*** |
| Somewhat                                                                                                                               | 1.30(1.13-1.48)*** | 2.07(1.82-2.36)*** | 1.60(1.43-1.81)*** |
| Quite a lot                                                                                                                            | 1.59(1.38-1.83)*** | 2.57(2.20-3.00)*** | 1.86(1.62-2.13)*** |
| What is your best guess as to whether you will get COVID-19 within the next 6 months? (SA)                                             |                    |                    |                    |
| I don't think I will get COVID-19                                                                                                      | 1.00               | 1.00               | 1.00               |
| I think I will get a mild case of COVID-19                                                                                             | 0.92(0.86-0.98)**  | 0.87(0.81-0.94)*** | 0.94(0.88-1.00)*   |
| I think I will get seriously ill from COVID-19                                                                                         | 1.12(1.03-1.22)*   | 0.81(0.73-0.91)*** | 0.95(0.86-1.04)    |
| I have already had COVID-19                                                                                                            | 0.21(0.13-0.35)*** | 0.23(0.17-0.32)*** | 0.32(0.22-0.44)*** |
| Has anyone close to you ever been infected with COVID-19? (MA)                                                                         |                    |                    |                    |
| Colleagues at work                                                                                                                     | 1.31(1.08-1.60)**  |                    |                    |
| No/I don't know.                                                                                                                       | 1.36(1.16-1.60)*** | 1.42(1.26-1.60)*** | 1.22(1.10-1.35)*** |
| Have you ever refrained from visiting a medical institution because you were anxious about being infected by the new coronavirus? (MA) |                    |                    |                    |
| Have refrained from regular hospital visits                                                                                            | 1.55(1.44-1.67)*** | 1.19(0.99-1.44)    | 1.35(1.18-1.55)*** |
| Have refrained from visiting the hospital for sudden symptoms such as a cold, headache, or stomachache                                 | 1.24(1.13-1.35)*** | 1.33(1.10-1.60)**  | 1.54(1.34-1.78)*** |
| Have refrained from medical checkups, physical examinations, or cancer screenings                                                      | 1.36(1.26-1.48)*** | 1.64(1.36-1.98)*** | 1.36(1.18-1.56)*** |
| Have refrained from other medical examinations                                                                                         | 1.26(1.16-1.38)*** | 1.30(1.07-1.59)*   | 1.33(1.15-1.54)*** |
| No                                                                                                                                     |                    | 1.24(1.02-1.50)*   | 1.24(1.07-1.43)**  |
| When a vaccine for COVID-19 becomes available, will you get vaccinated? (SA)                                                           |                    |                    |                    |
| Yes                                                                                                                                    | 1.00               | 1.00               | 1.00               |
| No                                                                                                                                     | 0.91(0.80-1.03)    | 0.85(0.75-0.98)*   | 0.90(0.80-1.01)    |
| Not sure                                                                                                                               | 0.93(0.87-1.01)    | 1.06(0.96-1.16)    | 1.08(1.00-1.16)    |
| How do you feel are the benefits of the COVID-19 vaccine? (SA)                                                                         |                    |                    |                    |
| Very small                                                                                                                             | 1.00               | 1.00               | 1.00               |
| Small                                                                                                                                  | 1.17(0.94-1.45)    | 1.21(0.96-1.51)    | 1.33(1.08-1.64)*   |
| Medium                                                                                                                                 | 1.31(1.06-1.61)*   | 1.39(1.13-1.72)**  | 1.53(1.25-1.87)*** |
| Large                                                                                                                                  | 1.31(1.07-1.61)*   | 1.74(1.40-2.15)*** | 1.66(1.36-2.03)*** |
| Very large                                                                                                                             | 1.38(1.11-1.72)**  | 1.71(1.34-2.18)*** | 1.64(1.32-2.04)*** |
| How do you think the disadvantages of the COVID-19 vaccine are? (SA)                                                                   |                    |                    |                    |
| Very small                                                                                                                             |                    |                    | 1.00               |
| Small                                                                                                                                  |                    |                    | 0.98(0.87-1.11)    |
| Medium                                                                                                                                 |                    |                    | 0.99(0.87-1.12)    |
| Large                                                                                                                                  |                    |                    | 0.91(0.79-1.05)    |
| Very large                                                                                                                             |                    |                    | 0.97(0.79-1.20)    |
| If others have been vaccinated against COVID-19, do you think you should be vaccinated as well? (SA)                                   |                    |                    |                    |
| Strongly disagree                                                                                                                      | 1.00               | 1.00               | 1.00               |



|                                                                                                          |                    |                    |                    |
|----------------------------------------------------------------------------------------------------------|--------------------|--------------------|--------------------|
| Disagree                                                                                                 | 1.03(0.85-1.26)    | 0.93(0.75-1.16)    | 0.94(0.78-1.14)    |
| Neither agree nor disagree                                                                               | 1.13(0.92-1.37)    | 0.87(0.70-1.08)    | 0.88(0.73-1.07)    |
| Agree                                                                                                    | 1.08(0.88-1.32)    | 1.08(0.86-1.35)    | 1.01(0.83-1.23)    |
| Strongly agree                                                                                           | 1.31(1.06-1.63)*   | 1.05(0.81-1.36)    | 1.16(0.93-1.44)    |
| Do you think getting a COVID-19 vaccine will ease your anxiety? (SA)                                     |                    |                    |                    |
| Strongly disagree                                                                                        | 1.00               | 1.00               | 1.00               |
| Disagree                                                                                                 | 0.83(0.70-0.99)*   | 0.82(0.66-1.01)    | 0.64(0.53-0.77)*** |
| Neither agree nor disagree                                                                               | 0.80(0.67-0.95)**  | 0.64(0.52-0.79)*** | 0.56(0.46-0.67)*** |
| Agree                                                                                                    | 0.71(0.60-0.85)*** | 0.64(0.52-0.80)*** | 0.55(0.45-0.66)*** |
| Strongly agree                                                                                           | 0.76(0.60-0.95)*   | 0.74(0.55-0.99)*   | 0.49(0.39-0.63)*** |
| Do you trust scientists in the field of vaccine development for COVID-19? (SA)                           |                    |                    |                    |
| Strongly distrust                                                                                        |                    |                    | 1.00               |
| Distrust                                                                                                 |                    |                    | 1.36(1.00-1.85)    |
| Neutral                                                                                                  |                    |                    | 1.35(1.00-1.84)    |
| Trust                                                                                                    |                    |                    | 1.42(1.04-1.94)*   |
| Strongly trust                                                                                           |                    |                    | 1.47(1.01-2.12)*   |
| Do you trust the public authorities to approve vaccines for COVID-19? (SA)                               |                    |                    |                    |
| Strongly distrust                                                                                        | 1.00               | 1.00               | 1.00               |
| Distrust                                                                                                 | 0.82(0.66-1.01)    | 0.86(0.67-1.09)    | 0.86(0.69-1.08)    |
| Neutral                                                                                                  | 0.69(0.56-0.85)*** | 0.83(0.65-1.06)    | 0.77(0.61-0.96)*   |
| Trust                                                                                                    | 0.73(0.59-0.90)**  | 0.80(0.62-1.03)    | 0.76(0.60-0.96)*   |
| Strongly trust                                                                                           | 0.71(0.53-0.93)*   | 0.43(0.30-0.60)*** | 0.59(0.43-0.81)**  |
| Do you trust your healthcare provider about vaccination against COVID-19? (SA)                           |                    |                    |                    |
| Strongly distrust                                                                                        | 1.00               | 1.00               | 1.00               |
| Distrust                                                                                                 | 1.26(0.93-1.72)    | 1.25(0.92-1.71)    | 1.22(0.88-1.68)    |
| Neutral                                                                                                  | 1.29(0.96-1.73)    | 1.39(1.03-1.87)*   | 1.29(0.95-1.77)    |
| Trust                                                                                                    | 1.25(0.92-1.69)    | 1.54(1.13-2.10)**  | 1.44(1.05-1.98)*   |
| Strongly trust                                                                                           | 1.13(0.82-1.57)    | 1.60(1.12-2.30)*   | 1.60(1.12-2.27)*   |
| Do you think that healthcare workers and employees of elderly care facilities should be vaccinated? (SA) |                    |                    |                    |
| Yes                                                                                                      | 1.00               | 1.00               | 1.00               |
| No                                                                                                       | 0.57(0.47-0.70)*** | 0.52(0.44-0.60)*** | 0.60(0.51-0.70)*** |
| Can't say either                                                                                         | 0.88(0.81-0.95)**  | 0.85(0.78-0.93)*** | 0.92(0.85-0.99)*   |
| Trust of information sources                                                                             |                    |                    |                    |
| Healthcare professionals                                                                                 | 1.11(1.05-1.17)*** | 1.12(1.04-1.20)**  | 1.14(1.08-1.21)*** |
| TV, radio and newspaper                                                                                  | 0.96(0.91-1.01)    |                    |                    |
| Books and magazines                                                                                      |                    | 0.86(0.80-0.93)*** | 0.93(0.88-0.99)*   |
| Medical information sites                                                                                |                    | 1.09(1.02-1.16)*   | 1.12(1.06-1.18)*** |
| Blogs or web pages of celebrities and famous people                                                      |                    | 0.92(0.85-0.99)*   | 0.92(0.87-0.98)**  |
| Public sectors                                                                                           |                    | 1.16(1.08-1.25)*** |                    |
| Family and friends                                                                                       |                    |                    | 0.95(0.90-1.00)*   |
| Scientists and researchers                                                                               |                    | 1.11(1.03-1.18)**  | 1.15(1.09-1.21)*** |
| Pharmaceutical and other companies                                                                       | 1.09(1.03-1.15)**  |                    |                    |

|              |                    |                    |                    |
|--------------|--------------------|--------------------|--------------------|
| Social media | 0.90(0.85-0.94)*** | 0.71(0.66-0.77)*** | 0.82(0.76-0.88)*** |
|--------------|--------------------|--------------------|--------------------|

\*, p<0.05, \*\*, p<0.01, \*\*\*, p<0.001

OR: Odds Ratio, CI: Confidence Intervals.

3Cs: “closed spaces”, “crowded places”, and “close-contact settings”

**Table S3.** Number of social network services used and adoption of preventive measures.

|                                        | OR (95% CI)         |                    |                     |
|----------------------------------------|---------------------|--------------------|---------------------|
|                                        | 3Cs avoidance       | Hand hygiene       | Respiratory hygiene |
| Number of social network services used |                     |                    |                     |
| 0                                      | 1.00                | 1.00               | 1.00                |
| 1                                      | 1.24(1.15-1.35)***  | 1.76(1.57-1.96)*** | 1.74(1.59-1.90)***  |
| 2                                      | 1.44(1.23-1.68)***  | 1.78(1.45-2.20)*** | 1.96(1.65-2.33)***  |
| 3                                      | 1.76(1.34-2.31)***  | 1.80(1.26-2.57)**  | 1.88(1.40-2.53)***  |
| 4                                      | 2.41(1.59-3.65)***  | 2.19(1.27-3.78)**  | 3.23(1.99-5.24)***  |
| 5                                      | 2.68(1.53-4.70)**   | 4.86(1.85-12.79)** | 2.32(1.22-4.40)*    |
| 6                                      | 4.55(2.03-10.19)*** | 3.28(1.03-10.47)*  | 9.35(2.64-33.13)**  |
| Age (SA)                               |                     |                    |                     |
| 20's                                   | 1.00                | 1.00               | 1.00                |
| 30's                                   | 1.53(1.36-1.73)***  | 1.62(1.44-1.83)*** | 1.72(1.55-1.92)***  |
| 40's                                   | 1.79(1.59-2.03)***  | 1.72(1.52-1.94)*** | 2.11(1.89-2.35)***  |
| 50's                                   | 2.34(2.06-2.66)***  | 2.00(1.74-2.29)*** | 2.74(2.44-3.09)***  |
| 60's                                   | 2.58(2.27-2.94)***  | 2.19(1.90-2.53)*** | 3.06(2.71-3.46)***  |
| 70's+                                  | 2.72(2.37-3.12)***  | 2.40(2.04-2.82)*** | 2.88(2.52-3.29)***  |
| Gender (SA)                            |                     |                    |                     |
| Female                                 | 1.00                | 1.00               | 1.00                |
| Male                                   | 0.70(0.66-0.75)***  | 0.65(0.61-0.71)*** | 0.61(0.57-0.65)***  |
| Highest educational level (SA)         |                     |                    |                     |
| Middle and High school                 | 1.00                | 1.00               | 1.00                |
| Junior college                         | 1.08(1.00-1.16)     | 1.11(1.00-1.22)    | 1.15(1.07-1.25)**   |
| University                             | 1.07(1.01-1.14)*    | 0.97(0.89-1.05)    | 1.02(0.96-1.09)     |
| Graduate School                        | 1.16(1.02-1.34)*    | 0.81(0.69-0.95)**  | 0.88(0.77-1.01)     |
| Region (SA)                            |                     |                    |                     |
| Hokkaido and Tohoku                    | 1.00                | 1.00               | 1.00                |
| Kanto                                  | 1.34(1.23-1.47)***  | 1.08(0.96-1.21)    | 1.17(1.07-1.29)**   |
| Chubu                                  | 1.03(0.93-1.14)     | 0.88(0.78-1.00)*   | 1.08(0.97-1.19)     |
| Kinki                                  | 1.17(1.06-1.29)**   | 0.96(0.85-1.09)    | 1.14(1.03-1.26)*    |
| Chugoku and Shikoku                    | 1.03(0.92-1.16)     | 0.76(0.66-0.87)*** | 1.00(0.89-1.12)     |
| Kyushu                                 | 1.09(0.98-1.21)     | 0.91(0.80-1.05)    | 1.20(1.08-1.34)**   |
| Occupation type (SA)                   |                     |                    |                     |
| Agriculture, forestry and fisheries    | 1.00                | 1.00               | 1.00                |
| Construction                           | 1.19(0.81-1.73)     | 1.06(0.71-1.58)    | 1.32(0.93-1.87)     |
| Manufacturing                          | 1.26(0.88-1.79)     | 1.20(0.83-1.75)    | 1.37(0.99-1.90)     |
| Information and communications         | 1.18(0.81-1.72)     | 1.32(0.88-1.96)    | 1.47(1.04-2.09)*    |

|                                                                                     |                    |                    |                    |
|-------------------------------------------------------------------------------------|--------------------|--------------------|--------------------|
| Transportation and postal services                                                  | 1.02(0.70-1.50)    | 1.50(1.00-2.24)    | 1.39(0.98-1.98)    |
| Wholesale and retail trade                                                          | 1.19(0.83-1.70)    | 1.40(0.96-2.05)    | 1.45(1.04-2.02)*   |
| Finance and insurance                                                               | 1.28(0.87-1.87)    | 1.37(0.90-2.07)    | 1.41(0.99-2.03)    |
| Real estate and goods rental and leasing                                            | 1.01(0.67-1.51)    | 0.90(0.59-1.4)     | 1.25(0.85-1.83)    |
| Scientific research, professional and technical services                            | 1.49(1.00-2.24)    | 1.74(1.1-2.77)*    | 1.74(1.17-2.58)**  |
| Accommodations, food and beverage services                                          | 1.17(0.80-1.72)    | 1.30(0.85-1.97)    | 1.33(0.92-1.91)    |
| Living-related and personal services and amusement services                         | 1.12(0.75-1.67)    | 1.54(0.99-2.41)    | 1.33(0.91-1.95)    |
| Education and learning support                                                      | 1.18(0.82-1.71)    | 1.43(0.96-2.15)    | 1.48(1.04-2.10)*   |
| Medical healthcare and welfare                                                      | 1.16(0.81-1.66)    | 1.23(0.84-1.81)    | 1.28(0.92-1.79)    |
| Combined services                                                                   | 1.23(0.79-1.93)    | 1.10(0.68-1.80)    | 1.39(0.91-2.14)    |
| Services (not elsewhere classified)                                                 | 1.25(0.88-1.79)    | 1.37(0.95-2.00)    | 1.44(1.04-2.01)*   |
| Public service (not elsewhere classified)                                           | 1.05(0.72-1.53)    | 1.33(0.89-1.99)    | 1.74(1.22-2.47)**  |
| Students                                                                            | 0.97(0.64-1.48)    | 1.15(0.76-1.75)    | 1.11(0.77-1.61)    |
| Homemaker                                                                           | 1.53(1.08-2.18)*   | 1.7(1.17-2.47)**   | 1.59(1.15-2.20)**  |
| Others                                                                              | 1.29(0.91-1.83)    | 1.28(0.89-1.85)    | 1.16(0.84-1.60)    |
| Annual household income in 2020 (million JPY) (SA)                                  |                    | 1.02(1.00-1.03)    | 1.02(1.01-1.03)**  |
| Household size including respondent (SA)                                            |                    |                    |                    |
| 1                                                                                   | 1.00               | 1.00               | 1.00               |
| 2                                                                                   | 1.24(1.14-1.36)*** | 1.40(1.25-1.56)*** | 1.22(1.12-1.34)*** |
| 3                                                                                   | 1.11(1.01-1.22)*   | 1.36(1.22-1.52)*** | 1.10(1.00-1.21)    |
| 4                                                                                   | 1.02(0.91-1.13)    | 1.32(1.16-1.50)*** | 1.20(1.07-1.33)**  |
| 5                                                                                   | 1.09(0.94-1.27)    | 1.48(1.23-1.77)*** | 1.29(1.11-1.50)**  |
| More than 6                                                                         | 0.98(0.80-1.20)    | 1.20(0.94-1.53)    | 1.12(0.91-1.38)    |
| Marital size (SA)                                                                   |                    |                    |                    |
| Married (including de facto marriage)                                               | 1.00               | 1.00               | 1.00               |
| Not married (without partner)                                                       | 1.14(1.04-1.24)**  | 1.19(1.07-1.32)**  | 1.23(1.12-1.34)*** |
| Not married (with a partner)                                                        | 1.05(0.91-1.20)    | 1.23(1.06-1.43)**  | 1.23(1.08-1.40)**  |
| Widowed                                                                             | 1.02(0.89-1.17)    | 1.05(0.86-1.30)    | 1.07(0.91-1.25)    |
| Divorced                                                                            | 1.08(0.97-1.21)    | 1.23(1.05-1.43)*   | 1.20(1.06-1.36)**  |
| Self-reported health status (SA)                                                    |                    |                    |                    |
| Very good                                                                           | 1.00               | 1.00               | 1.00               |
| Good                                                                                | 0.93(0.87-1.00)*   | 1.05(0.96-1.16)    | 1.05(0.97-1.13)    |
| Fair                                                                                | 0.92(0.85-0.99)*   | 0.98(0.89-1.08)    | 0.99(0.91-1.07)    |
| Poor                                                                                | 0.90(0.82-1.00)*   | 1.04(0.91-1.18)    | 0.97(0.88-1.08)    |
| Very poor                                                                           | 0.99(0.82-1.19)    | 0.84(0.67-1.04)    | 0.84(0.69-1.02)    |
| How confident are you filling out medical forms by yourself? (health literacy) (SA) |                    |                    |                    |
| Not at all                                                                          | 1.00               | 1.00               | 1.00               |
| A little bit                                                                        | 0.95(0.72-1.25)    | 1.57(1.20-2.04)**  | 1.22(0.96-1.57)    |
| Somewhat                                                                            | 1.12(0.87-1.44)    | 1.78(1.41-2.27)*** | 1.31(1.05-1.64)*   |
| Extremely                                                                           | 1.39(1.08-1.78)*   | 2.55(2.01-3.23)*** | 1.68(1.34-2.09)*** |
| Quite a bit                                                                         | 1.74(1.35-2.23)*** | 3.03(2.39-3.86)*** | 2.11(1.68-2.64)*** |
| Have you ever received a COVID-19 test? (MA)                                        |                    |                    |                    |

|                                                                                                                                        |                    |                    |                    |
|----------------------------------------------------------------------------------------------------------------------------------------|--------------------|--------------------|--------------------|
| No                                                                                                                                     |                    | 2.78(2.25-3.42)*** | 1.49(1.14-1.96)**  |
| Yes – PCR test                                                                                                                         |                    | 2.26(1.78-2.86)*** | 1.41(1.06-1.88)*   |
| Yes – antigen test                                                                                                                     |                    | 1.75(1.27-2.41)**  |                    |
| Yes – antibody testing                                                                                                                 |                    | 2.12(1.49-3.03)*** | 1.51(1.07-2.12)*   |
| Yes – unsure about either of the three                                                                                                 | 0.43(0.33-0.57)*** |                    | 0.56(0.40-0.80)**  |
| Living with family members who are elderly or have underlying diseases (SA)                                                            |                    |                    |                    |
| Yes                                                                                                                                    |                    | 1.00               | 1.00               |
| No                                                                                                                                     |                    | 0.82(0.74-0.91)*** | 0.81(0.75-0.88)*** |
| Do you receive an influenza vaccine? (SA)                                                                                              |                    |                    |                    |
| Every year                                                                                                                             | 1.00               | 1.00               |                    |
| Every few years                                                                                                                        | 0.99(0.92-1.07)    | 0.92(0.83-1.02)    |                    |
| Rarely or never                                                                                                                        | 0.94(0.88-1.01)    | 0.74(0.67-0.81)*** |                    |
| Did you receive on routine immunization? (SA)                                                                                          |                    |                    |                    |
| All                                                                                                                                    | 1.00               | 1.00               | 1.00               |
| Partially                                                                                                                              | 0.82(0.76-0.90)*** | 0.85(0.75-0.95)**  | 0.91(0.83-1.00)*   |
| None                                                                                                                                   | 0.80(0.74-0.86)*** | 0.94(0.84-1.05)    | 0.88(0.82-0.96)**  |
| Not sure                                                                                                                               | 0.72(0.67-0.79)*** | 0.91(0.81-1.02)    | 0.87(0.80-0.95)**  |
| How anxious are you about COVID-19? (SA)                                                                                               |                    |                    |                    |
| Not at all anxious                                                                                                                     | 1.00               | 1.00               | 1.00               |
| Vaguely anxious                                                                                                                        | 1.62(1.44-1.83)*** | 2.24(2.01-2.49)*** | 1.67(1.51-1.85)*** |
| Have a clear sense of anxiety                                                                                                          | 2.75(2.42-3.13)*** | 3.02(2.65-3.45)*** | 1.90(1.70-2.14)*** |
| Feel fear and have anxiety                                                                                                             | 3.28(2.80-3.83)*** | 2.15(1.81-2.54)*** | 1.79(1.54-2.08)*** |
| To what extent did the COVID-19 pandemic affect your life, within the past year? (SA)                                                  |                    |                    |                    |
| Not at all                                                                                                                             | 1.00               | 1.00               | 1.00               |
| Not much                                                                                                                               | 1.18(1.03-1.35)*   | 1.41(1.24-1.59)*** | 1.38(1.22-1.55)*** |
| Somewhat                                                                                                                               | 1.46(1.28-1.67)*** | 2.47(2.18-2.81)*** | 1.89(1.68-2.12)*** |
| Quite a lot                                                                                                                            | 1.80(1.57-2.08)*** | 3.10(2.67-3.61)*** | 2.21(1.93-2.52)*** |
| What is your best guess as to whether you will get COVID-19 within the next 6 months? (SA)                                             |                    |                    |                    |
| I don't think I will get COVID-19                                                                                                      | 1.00               | 1.00               | 1.00               |
| I think I will get a mild case of COVID-19                                                                                             | 0.91(0.86-0.97)**  | 0.87(0.81-0.94)*** | 0.94(0.88-0.99)*   |
| I think I will get seriously ill from COVID-19                                                                                         | 1.09(1.00-1.18)    | 0.80(0.72-0.90)*** | 0.92(0.84-1.01)    |
| I have already had COVID-19                                                                                                            | 0.18(0.11-0.30)*** | 0.19(0.14-0.26)*** | 0.27(0.19-0.37)*** |
| Has anyone close to you ever been infected with COVID-19? (MA)                                                                         |                    |                    |                    |
| Colleagues at work                                                                                                                     | 1.28(1.05-1.56)*   |                    |                    |
| No/I don't know.                                                                                                                       | 1.33(1.13-1.56)**  | 1.41(1.26-1.59)*** | 1.21(1.10-1.34)*** |
| Have you ever refrained from visiting a medical institution because you were anxious about being infected by the new coronavirus? (MA) |                    |                    |                    |
| Have refrained from regular hospital visits                                                                                            | 1.58(1.47-1.69)*** | 1.36(1.14-1.64)**  | 1.45(1.27-1.66)*** |
| Have refrained from visiting the hospital for sudden symptoms such as a cold, headache, or stomachache                                 | 1.28(1.17-1.40)*** | 1.56(1.29-1.88)*** | 1.68(1.46-1.93)*** |
| Have refrained from medical checkups, physical examinations, or cancer screenings                                                      | 1.42(1.31-1.54)*** | 1.86(1.55-2.25)*** | 1.48(1.29-1.70)*** |
| Have refrained from other medical examinations                                                                                         | 1.30(1.19-1.41)*** | 1.45(1.19-1.77)*** | 1.42(1.23-1.64)*** |
| No                                                                                                                                     |                    | 1.35(1.12-1.63)**  | 1.28(1.11-1.47)**  |

|                                                                                                      |                    |                    |                    |
|------------------------------------------------------------------------------------------------------|--------------------|--------------------|--------------------|
| When a vaccine for COVID-19 becomes available, will you get vaccinated? (SA)                         |                    |                    |                    |
| Yes                                                                                                  | 1.00               | 1.00               | 1.00               |
| No                                                                                                   | 0.90(0.79-1.01)    | 0.83(0.72-0.94)**  | 0.87(0.77-0.98)*   |
| Not sure                                                                                             | 0.95(0.88-1.02)    | 1.08(0.99-1.18)    | 1.09(1.01-1.18)*   |
| How do you feel are the benefits of the COVID-19 vaccine? (SA)                                       |                    |                    |                    |
| Very small                                                                                           | 1.00               | 1.00               | 1.00               |
| Small                                                                                                | 1.20(0.96-1.49)    | 1.27(1.02-1.58)*   | 1.36(1.11-1.68)**  |
| Medium                                                                                               | 1.32(1.07-1.61)**  | 1.43(1.17-1.75)**  | 1.54(1.26-1.87)*** |
| Large                                                                                                | 1.36(1.11-1.67)**  | 1.90(1.54-2.34)*** | 1.74(1.43-2.12)*** |
| Very large                                                                                           | 1.44(1.16-1.79)**  | 1.84(1.45-2.33)*** | 1.72(1.39-2.12)*** |
| How do you think the disadvantages of the COVID-19 vaccine are? (SA)                                 |                    |                    |                    |
| Very small                                                                                           |                    |                    | 1.00               |
| Small                                                                                                |                    |                    | 0.97(0.87-1.10)    |
| Medium                                                                                               |                    |                    | 0.96(0.85-1.09)    |
| Large                                                                                                |                    |                    | 0.89(0.77-1.03)    |
| Very large                                                                                           |                    |                    | 0.91(0.74-1.12)    |
| If others have been vaccinated against COVID-19, do you think you should be vaccinated as well? (SA) |                    |                    |                    |
| Strongly disagree                                                                                    | 1.00               | 1.00               | 1.00               |
| Disagree                                                                                             | 1.03(0.84-1.25)    | 0.96(0.78-1.18)    | 0.96(0.79-1.15)    |
| Neither agree nor disagree                                                                           | 1.09(0.90-1.33)    | 0.84(0.68-1.04)    | 0.86(0.71-1.04)    |
| Agree                                                                                                | 1.05(0.86-1.29)    | 1.07(0.86-1.33)    | 1.00(0.82-1.21)    |
| Strongly agree                                                                                       | 1.29(1.04-1.59)*   | 1.06(0.83-1.37)    | 1.14(0.92-1.41)    |
| Do you think getting a COVID-19 vaccine will ease your anxiety? (SA)                                 |                    |                    |                    |
| Strongly disagree                                                                                    | 1.00               | 1.00               | 1.00               |
| Disagree                                                                                             | 0.83(0.70-0.99)*   | 0.83(0.67-1.01)    | 0.64(0.54-0.77)*** |
| Neither agree nor disagree                                                                           | 0.77(0.65-0.92)**  | 0.60(0.49-0.74)*** | 0.53(0.45-0.64)*** |
| Agree                                                                                                | 0.70(0.59-0.83)*** | 0.62(0.50-0.76)*** | 0.53(0.44-0.64)*** |
| Strongly agree                                                                                       | 0.70(0.56-0.87)**  | 0.64(0.48-0.85)**  | 0.45(0.35-0.57)*** |
| Do you trust scientists in the field of vaccine development for COVID-19? (SA)                       |                    |                    |                    |
| Strongly distrust                                                                                    |                    |                    | 1.00               |
| Distrust                                                                                             |                    |                    | 1.39(1.03-1.88)*   |
| Neutral                                                                                              |                    |                    | 1.39(1.03-1.89)*   |
| Trust                                                                                                |                    |                    | 1.47(1.08-2.00)*   |
| Strongly trust                                                                                       |                    |                    | 1.49(1.04-2.15)*   |
| Do you trust the public authorities to approve vaccines for COVID-19? (SA)                           |                    |                    |                    |
| Strongly distrust                                                                                    | 1.00               | 1.00               | 1.00               |
| Distrust                                                                                             | 0.83(0.68-1.03)    | 0.84(0.66-1.07)    | 0.84(0.68-1.05)    |
| Neutral                                                                                              | 0.69(0.56-0.84)*** | 0.78(0.62-0.99)*   | 0.73(0.58-0.91)**  |
| Trust                                                                                                | 0.71(0.58-0.88)**  | 0.74(0.58-0.95)*   | 0.70(0.56-0.88)**  |
| Strongly trust                                                                                       | 0.67(0.50-0.88)**  | 0.37(0.26-0.52)*** | 0.51(0.37-0.70)*** |
| Do you trust your healthcare provider about vaccination against COVID-19? (SA)                       |                    |                    |                    |
| Strongly distrust                                                                                    | 1.00               | 1.00               | 1.00               |

|                                                                                                          |                    |                    |                    |
|----------------------------------------------------------------------------------------------------------|--------------------|--------------------|--------------------|
| Distrust                                                                                                 | 1.29(0.95-1.76)    | 1.28(0.95-1.74)    | 1.23(0.90-1.69)    |
| Neutral                                                                                                  | 1.35(1.00-1.81)    | 1.49(1.11-2.00)**  | 1.36(1.00-1.85)    |
| Trust                                                                                                    | 1.36(1.01-1.84)*   | 1.79(1.32-2.42)*** | 1.60(1.17-2.19)**  |
| Strongly trust                                                                                           | 1.24(0.90-1.72)    | 1.91(1.34-2.72)*** | 1.80(1.27-2.54)**  |
| Do you think that healthcare workers and employees of elderly care facilities should be vaccinated? (SA) |                    |                    |                    |
| Yes                                                                                                      | 1.00               | 1.00               | 1.00               |
| No                                                                                                       | 0.53(0.44-0.64)*** | 0.46(0.40-0.54)*** | 0.55(0.47-0.64)*** |
| Can't say either                                                                                         | 0.88(0.81-0.95)**  | 0.84(0.77-0.92)*** | 0.92(0.85-0.99)*   |
| Trust in information sources                                                                             |                    |                    |                    |
| Healthcare professionals                                                                                 | 1.11(1.05-1.17)*** | 1.09(1.01-1.16)*   | 1.1(1.03-1.16)**   |
| TV, radio and newspaper                                                                                  | 0.94(0.88-0.99)*   |                    |                    |
| Books and magazines                                                                                      |                    | 0.88(0.82-0.95)*** | 0.92(0.87-0.98)**  |
| Scientific literature                                                                                    |                    |                    | 1.07(1.01-1.13)*   |
| The Internet                                                                                             |                    | 1.08(1.00-1.17)    | 1.07(1.01-1.14)*   |
| Medical information sites                                                                                |                    | 1.15(1.08-1.23)*** | 1.15(1.09-1.21)*** |
| Blogs or web pages of celebrities and famous people                                                      |                    | 0.89(0.82-0.96)**  | 0.90(0.85-0.96)**  |
| Governments                                                                                              | 1.08(1.02-1.14)*   | 1.28(1.19-1.38)*** | 1.12(1.06-1.19)*** |
| Family and friends                                                                                       |                    | 1.07(0.99-1.15)    |                    |
| Scientists and researchers                                                                               | 1.10(1.05-1.15)*** | 1.18(1.09-1.27)*** | 1.16(1.09-1.23)*** |
| Pharmaceutical and other companies                                                                       |                    | 0.89(0.81-0.98)*   | 0.94(0.87-1.01)    |
| Social media                                                                                             | 0.86(0.82-0.91)*** | 0.63(0.58-0.69)*** | 0.73(0.68-0.78)*** |

\*, p<0.05, \*\*: p<0.01, \*\*\*: p<0.001

OR: Odds Ratio, CI: Confidence Intervals.

3Cs: "closed spaces", "crowded places", and "close-contact settings"
